# Supplementary material for: Multivariate bias corrections of climate simulations: which benefits for which losses?
Source: Copernicus journal article supplement (doi:10.5194/esd-11-537-2020), 2020-06-15
Supplement: Supplementary file 1 [file esd-11-537-2020-supplement.pdf]

Supplement of Earth Syst. Dynam., 11, 537–562, 2020  
<https://doi.org/10.5194/esd-11-537-2020-supplement>  
© Author(s) 2020. This work is distributed under  
the Creative Commons Attribution 4.0 License.

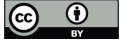

*Supplement of*

## **Multivariate bias corrections of climate simulations: which benefits for which losses?**

**Bastien François et al.**

*Correspondence to:* Bastien François ([bastien.francois@lsce.ipsl.fr](mailto:bastien.francois@lsce.ipsl.fr))

The copyright of individual parts of the supplement might differ from the CC BY 4.0 License.

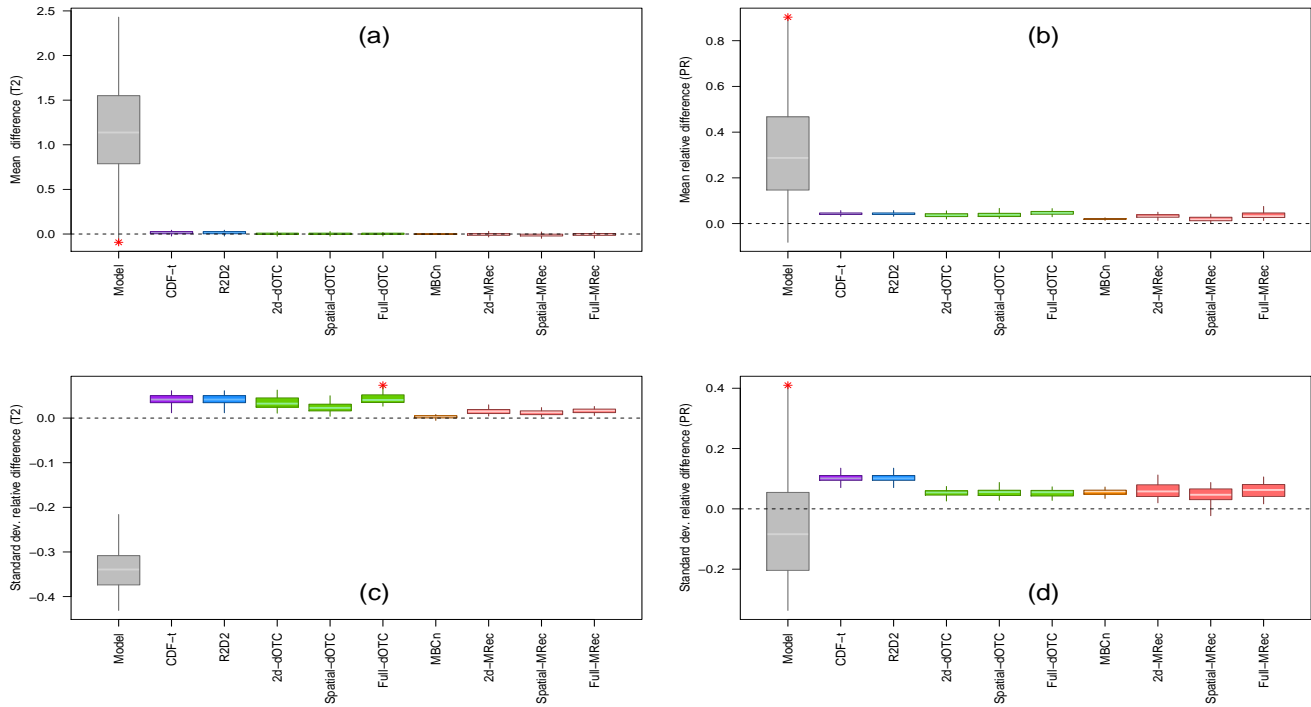

**Figure S1.** Boxplots of mean (**a and b**) and standard deviation (**c and d**) differences for Temperature (T2, **a** and **c**) and Precipitation (PR, **b** and **d**) during winter over the 1979-2016 period for the Brittany region (SAFRAN reference). Results are shown for: plain IPSL; CDF-t; R<sup>2</sup>D<sup>2</sup>; dOTC (2d-, Spatial- and Full-versions); MBC-n and MRec (2d-, Spatial- and Full-versions) outputs. Red asterisks indicate values lying outside the plotted range.

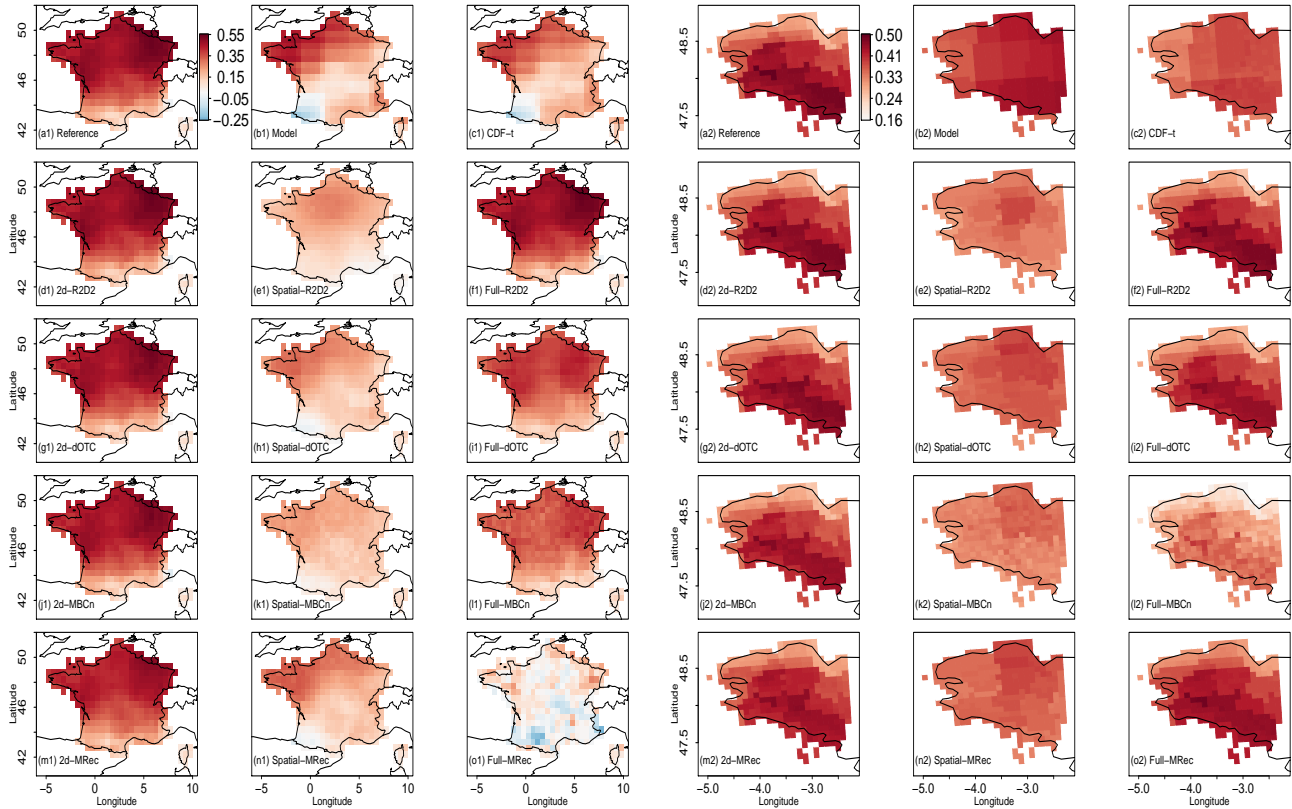

**Figure S2.** Maps of temperature vs. precipitation Spearman correlation maps computed at each grid cell using WFDEI reference (**a1-o1**) and SAFRAN reference (**a2-o2**) during winter over the 1979-2016 period. Results are shown for: Reference; plain IPSL; CDF-t;  $R^2D^2$ ; dOTC; MBC-n and MRec outputs for respectively 2d-, Spatial- and Full- versions. Note that the color scales between (**a1-o1**) and (**a2-o2**) are not the same to better emphasize intensities of values of the two regions.

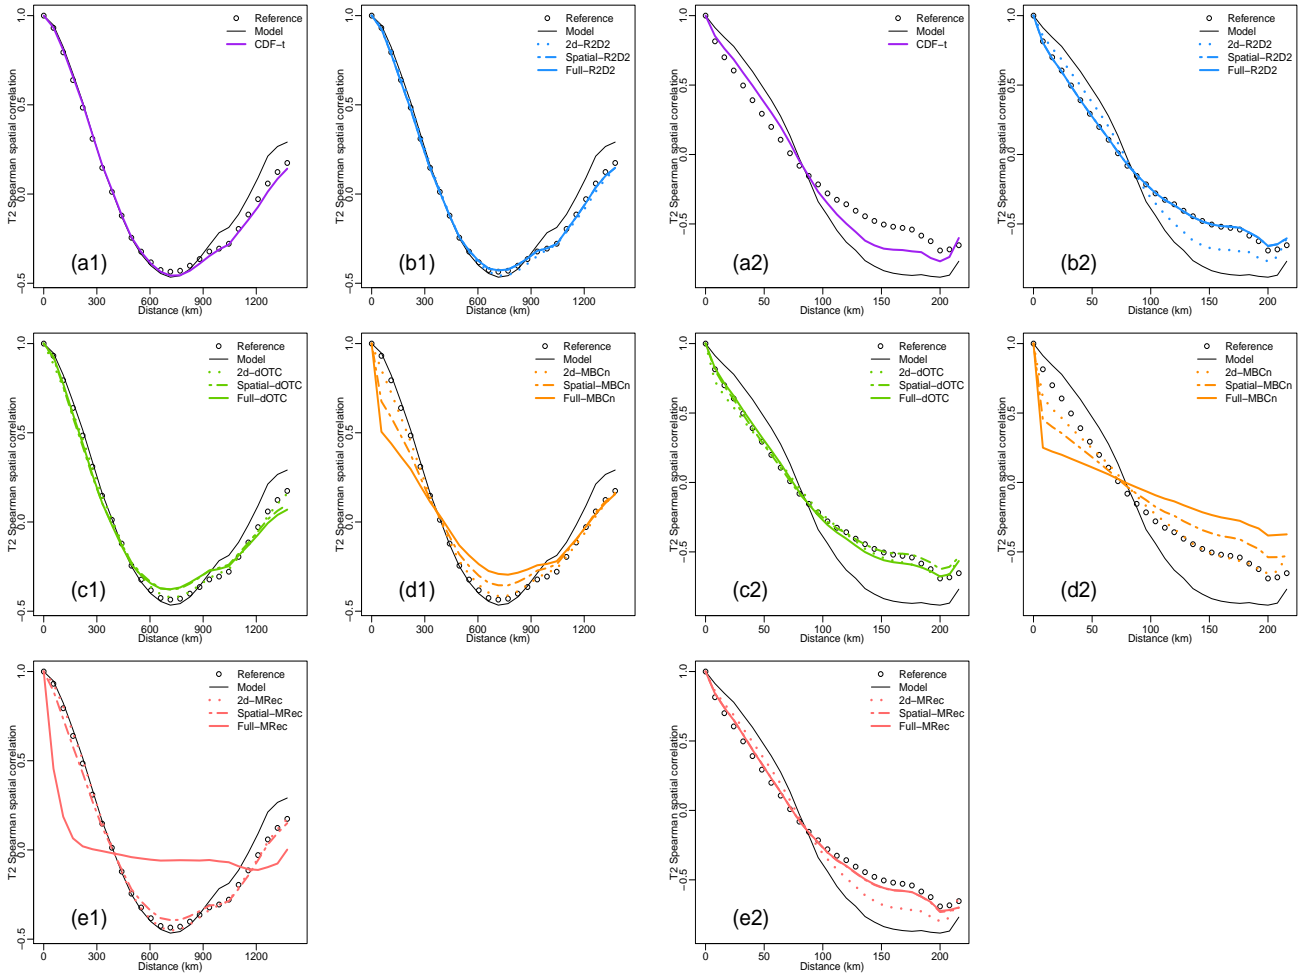

**Figure S3.** Correlograms for temperature using WFDEI reference (a1-e1) and SAFRAN reference (a2-e2) during winter over the 1979-2016 period. Results are shown for Reference (circles) and plain IPSL (black line). Results are displayed for: CDF-t;  $R^2D^2$ ; dOTC; MBC-n and MRec outputs for respectively 2d- (dotted), Spatial- (dashed) and Full-versions (solid lines).

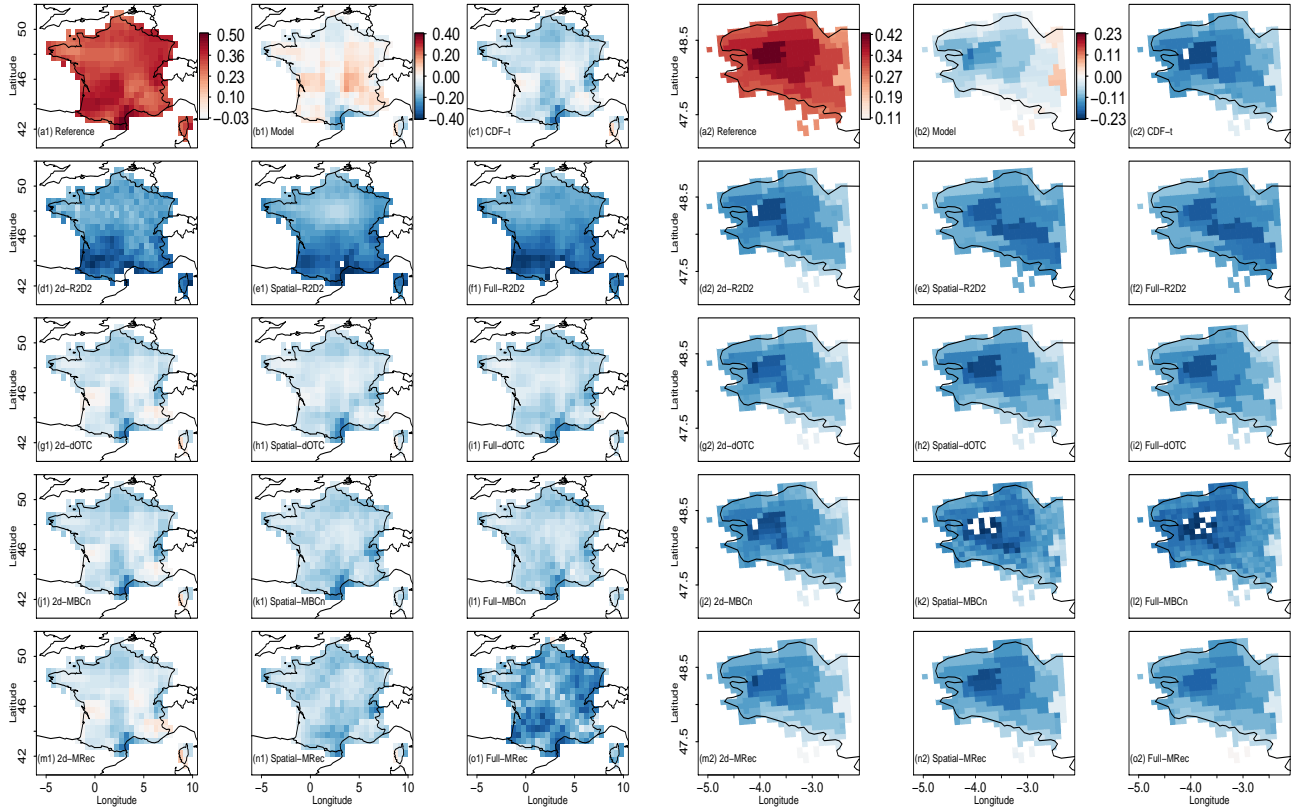

**Figure S4.** Differences of order 1 autocorrelation for precipitation using WFDEI reference (**a1-o1**) and SAFRAN reference (**a2-o2**) during winter over the 1979-2016 period. Results are shown for: Reference; plain IPSL; CDF-t;  $R^2D^2$ ; dOTC; MBC-n and MRec outputs for respectively 2d-, Spatial- and Full- versions. Note that the color scales between (**a1-o1**) and (**a2-o2**) are not the same to better emphasize intensities of values of the two regions.

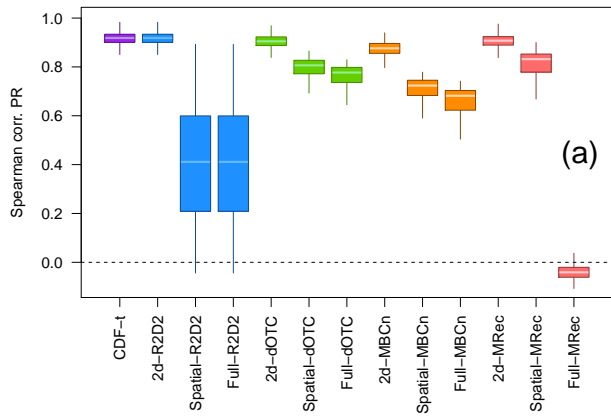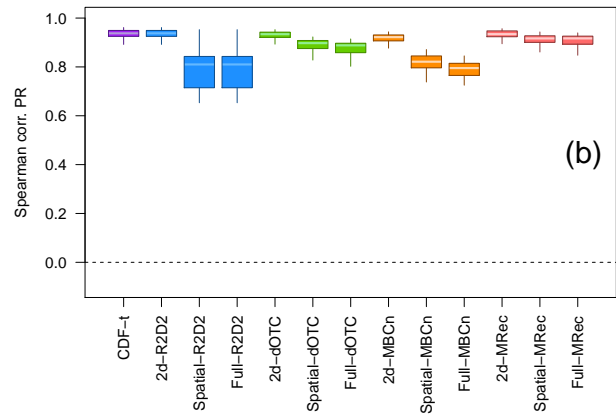

**Figure S5.** Boxplots of rank correlation computed at each grid cell between the bias corrected and the raw climate model time series for precipitation using WFDEI for France **(a)** and SAFRAN for Brittany **(b)** region during winter over the 1979-2016 period. For both boxplots, results are shown for: CDF-t;  $R^2D^2$ ; dOTC; MBC-n and MRec outputs for 2d-, Spatial- and Full-versions.

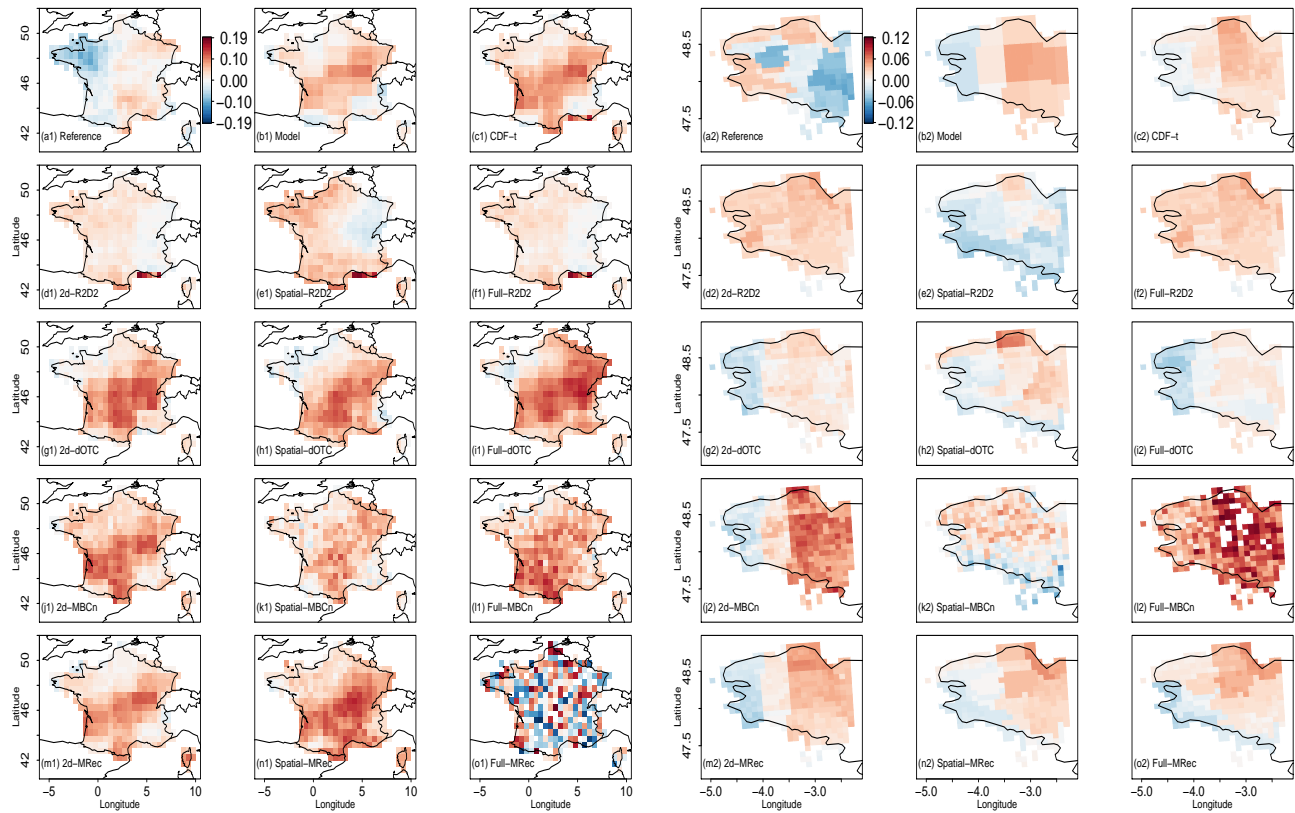

**Figure S6.** Differences of temperature vs. precipitation Spearman correlation computed at each grid cell between the 1979-1997 and 1998-2016 periods during summer. WFDEI (**a1-o1**) and SAFRAN (**a2-o2**) data are used for the bias correction. Note that the color scales between (**a1-o1**) and (**a2-o2**) are not the same to better emphasize intensities of values of the two regions.

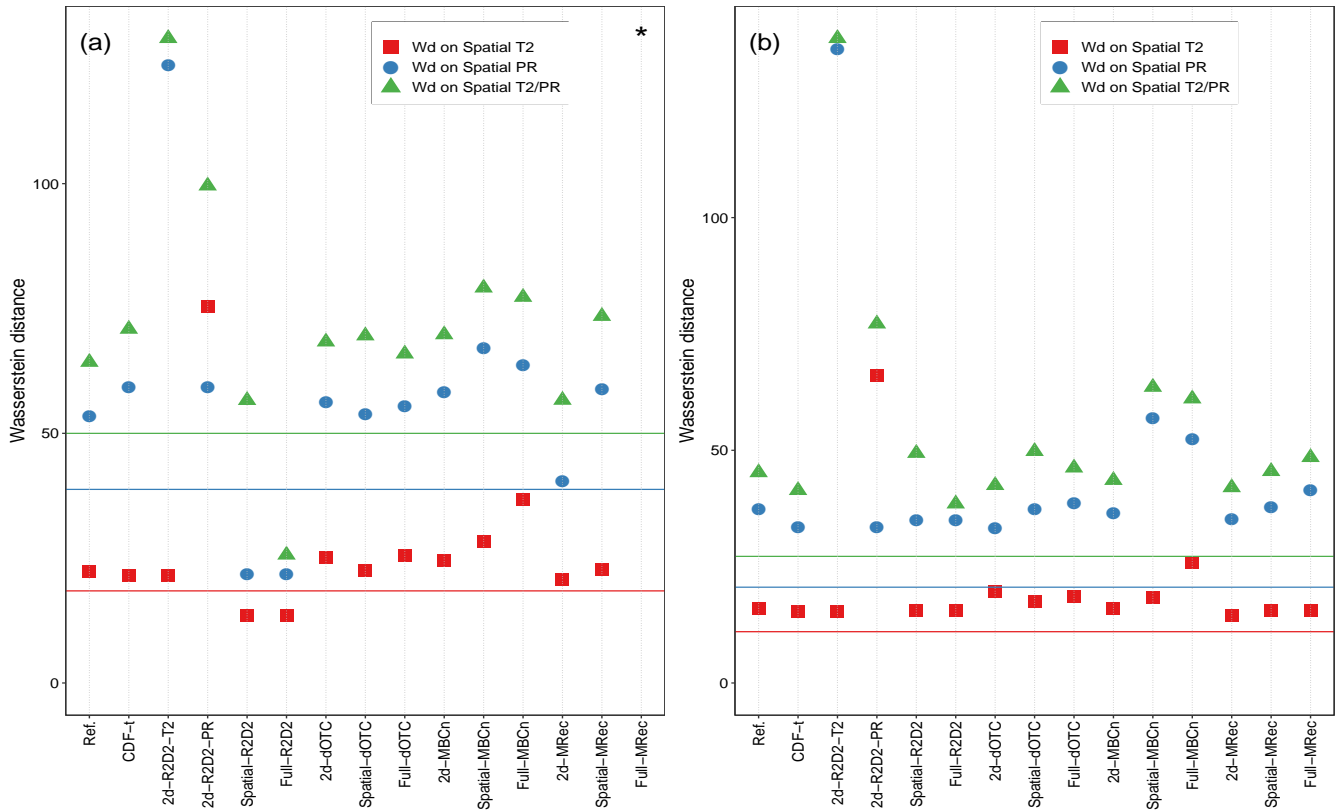

**Figure S7.** Values of the three Wasserstein distances between 1979-1997 and 1998-2016 periods during winter for temperature (square), precipitation (circle) and both temperature and precipitation (triangle) for the region of France **(a)** and Brittany **(b)**. Results are presented for: Reference; plain IPSL (lines); CDF-t and the different multivariate BC outputs. 2d-R<sup>2</sup>D<sup>2</sup>-T2 (resp. 2d-R<sup>2</sup>D<sup>2</sup>-PR) indicates results for 2d-R<sup>2</sup>D<sup>2</sup> with temperature (resp. precipitation) used as reference dimension. Black asterisks indicate values lying outside the plotted range.



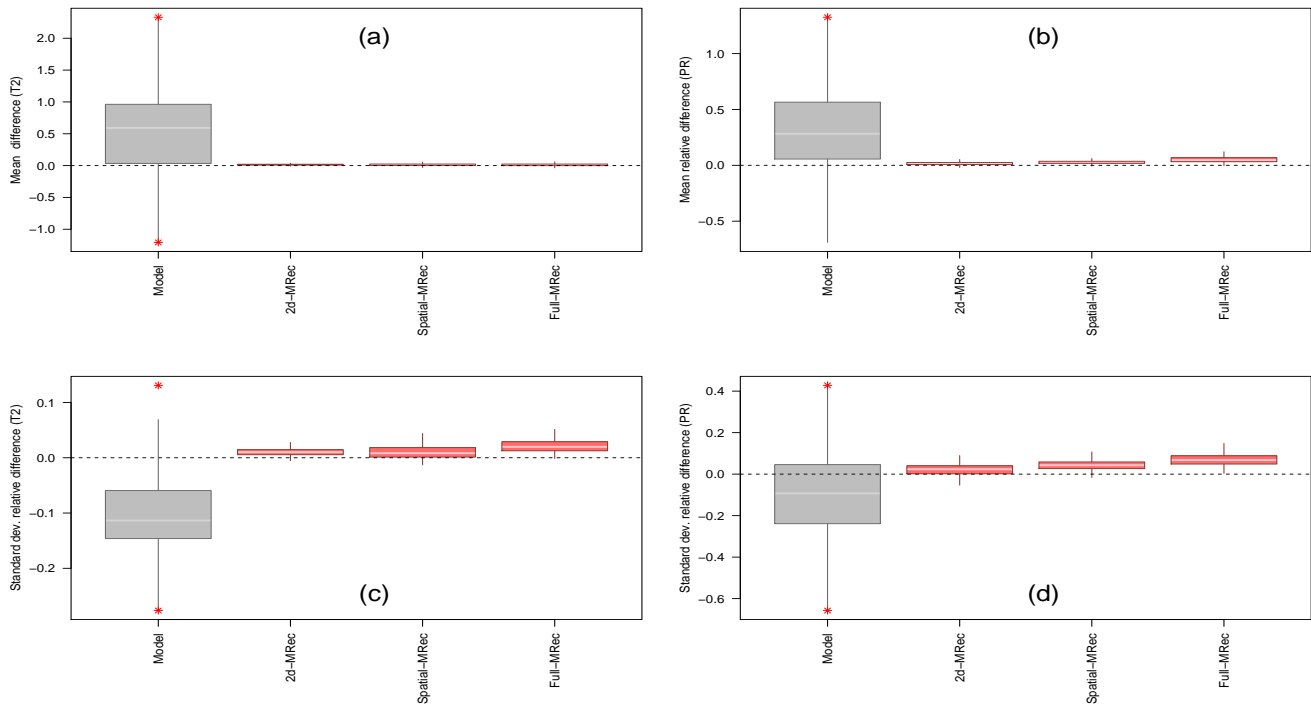

**Figure S8.** Boxplots of mean (a and b) and standard deviation (c and d) differences for Temperature (T2, a and c) and Precipitation (PR, b and d) during winter over the 1979-2016 period for the France region (WFDEI reference) with seasonal BC. Results are shown for: plain IPSL and MRec (2d-, Spatial- and Full-versions) outputs. Red asterisks indicate values lying outside the plotted range.

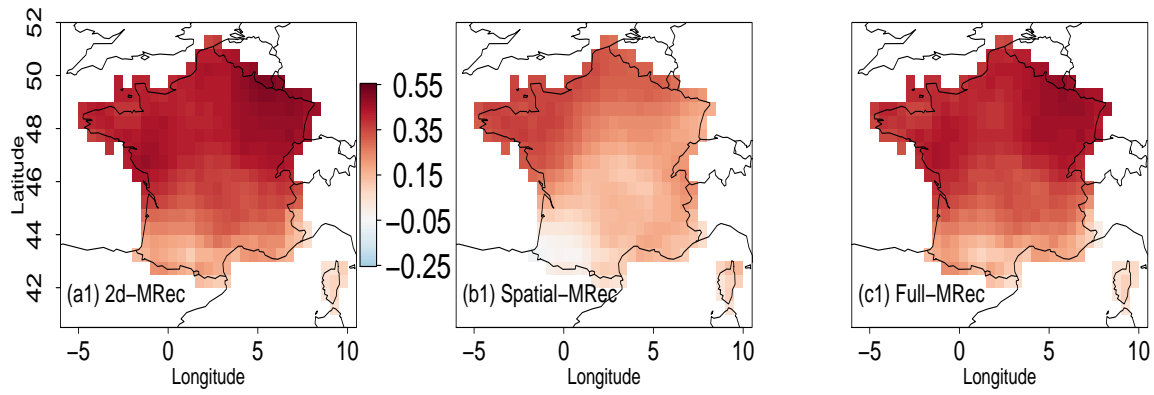

**Figure S9.** Temperature vs. precipitation Spearman correlation maps computed at each grid cell using WFDEI reference (**a1-c1**) during winter over the 1979-2016 period with seasonal BC. Results are shown for MRec (**a1-c1**) outputs for respectively 2d-, Spatial- and Full-versions.

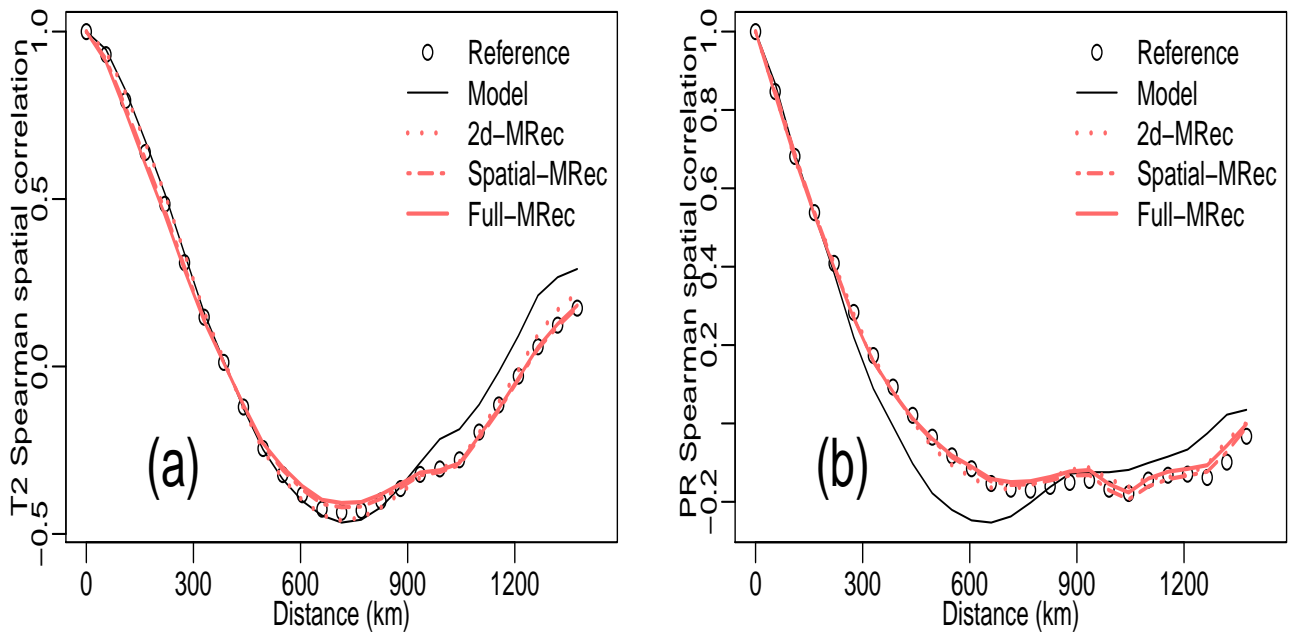

**Figure S10.** Correlograms for temperature (a) and precipitation (b) using WFDEI reference for France during winter over the 1979-2016 period with seasonal BC. Results are shown for: Reference (circles), plain IPSL (black line) and MRec outputs for respectively 2d- (dotted), Spatial- (dashed) and Full-versions (solid lines).

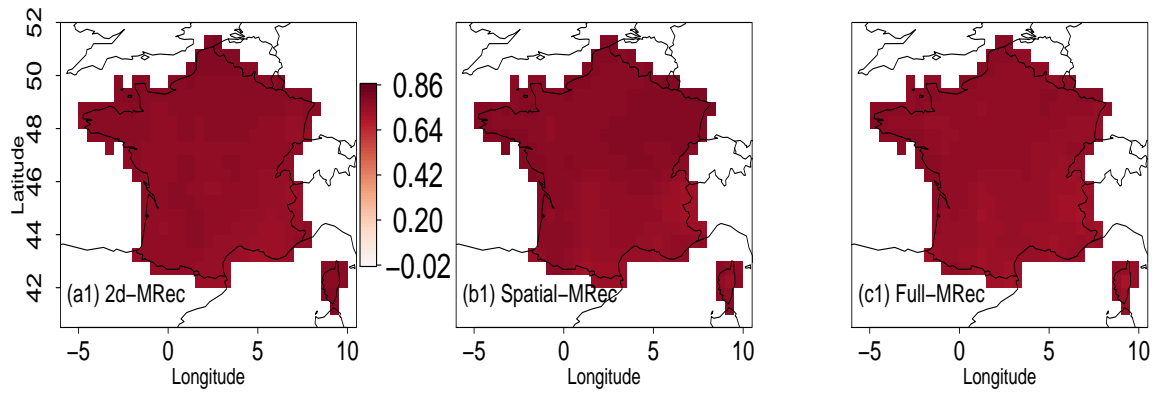

**Figure S11.** Order 1 Pearson autocorrelation for temperature using WFDEI reference during winter over the 1979-2016 period for the seasonal BC. Results are shown for MRec outputs for 2d-, Spatial- and Full-versions.

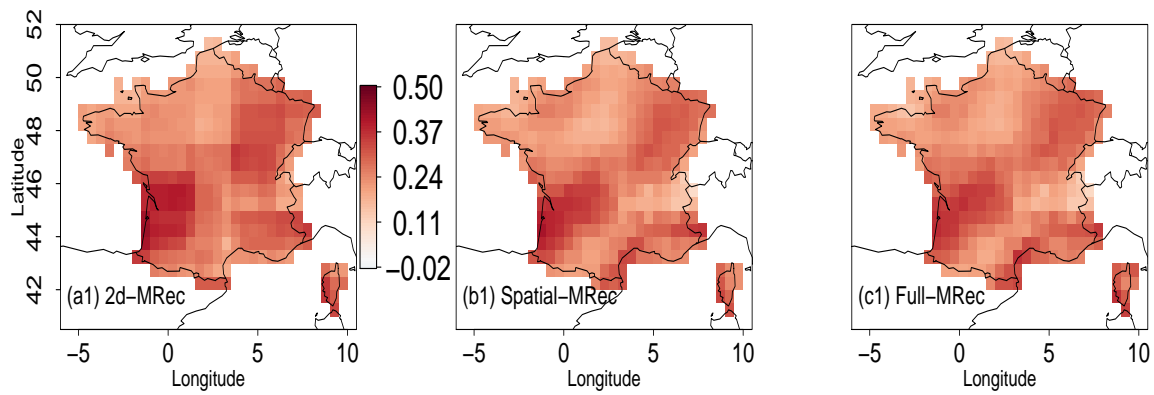

**Figure S12.** Order 1 Pearson autocorrelation for precipitation using WFDEI reference during winter over the 1979-2016 period for the seasonal BC. Results are shown for MRec outputs for 2d-, Spatial- and Full-versions.
